# Supplementary material for: Added Value of Next-Generation Sequencing for Multilocus Sequence Typing Analysis of a Pneumocystis jirovecii Pneumonia Outbreak
Source: PubMed Central journal article supplement (PMC5547796; doi:10.3201/eid2308.161295), 2017-08
Supplement: 16-1295-Techapp-s1.pdf [file 16-1295-Techapp-s1.pdf]

# Added Value of Next-Generation Sequencing for Multilocus Sequence Typing Analysis of a *Pneumocystis jirovecii* Pneumonia Outbreak

## Technical Appendix

**Technical Appendix Table 1.** PCR1 and PCR2 primers and amplification conditions\*

| Locus                                  | Primers                                                                                   | Amplicon size, bp | Annealing | Mg2+, nM | No. cycles |
|----------------------------------------|-------------------------------------------------------------------------------------------|-------------------|-----------|----------|------------|
| <b>PCR 1 (specific amplification)</b>  |                                                                                           |                   |           |          |            |
| <i>mtLSU</i>                           | F: Universal tail-TTTTGCATAATGGGTCAGCA;<br>R: Universal tail-TCGGCGAATAGGATTTTCAC         | 732               | 65°C      | 1.5      | 35         |
| <i>CYTb</i>                            | F: Universal tail-CTCCCAGAATTCTCGTTTGG<br>R: Universal tail-GTCCAAGCGTCACAAAAGGT          | 735               | 65°C      | 1.5      | 35         |
| <i>SOD</i>                             | F: Universal tail-CTTTCTCATGATTTGCTTGAGG<br>R: Universal tail-CCTTTTGCTTCATTAGTCAAAAAATTA | 761               | 60°C      | 2.5      | 40         |
| <b>PCR 2 (universal amplification)</b> |                                                                                           |                   |           |          |            |
| <i>mtLSU</i>                           | F: Primer(A)-Key-MID-Universal tail                                                       | ≈800              | 65°C      | 3        | 40         |
| <i>CYTb</i>                            | R: Primer(B)-Key-MID-Universal tail                                                       |                   |           |          |            |
| <i>SOD</i>                             |                                                                                           |                   |           |          |            |

\*Universal tail = M13 universal primer (Forward: TGTAACGACGGCCAGT; Reverse: CAGGAAACAGCTATGACC); *mtLSU* = mitochondrial rRNA large-sub-unit; *CYTb* = cytochrome B; *SOD*: superoxide dismutase.

**Technical Appendix Table 2.** Polymorphisms association corresponding to each haplotype for *mtLSU*, *CYTb*, and *SOD* loci\*

| Haplotype | Polymorphisms |       |       |       |       |       |       |       |       |       |
|-----------|---------------|-------|-------|-------|-------|-------|-------|-------|-------|-------|
|           | 13002         | 13215 | 13378 | 13505 | 13543 | 13554 | 13556 | 13557 | 13558 | 13560 |
| A         | C             | C     | C     | C     | C     | C     | G     | T     | A     | T     |
| B         | C             | C     | T     | C     | C     | C     | G     | T     | A     | T     |
| C         | C             | C     | T     | C     | C     | A     | T     | A     | C     | G     |
| D         | C             | C     | C     | C     | C     | A     | T     | A     | C     | G     |
| E         | C             | T     | C     | C     | T     | C     | G     | T     | A     | T     |
| F         | C             | A     | C     | C     | C     | C     | G     | T     | A     | T     |
| G         | C             | A     | C     | T     | T     | C     | G     | T     | A     | T     |
| H         | C             | A     | T     | C     | C     | C     | G     | T     | A     | T     |
| I         | G             | T     | C     | C     | C     | C     | G     | T     | A     | T     |
| J         | G             | T     | T     | C     | C     | C     | G     | T     | A     | T     |
| K         | G             | C     | T     | C     | C     | C     | G     | T     | A     | T     |
| L         | C             | T     | T     | C     | C     | C     | G     | T     | A     | T     |
| M         | C             | A     | C     | C     | T     | C     | G     | T     | A     | T     |
| N         | G             | C     | C     | C     | C     | C     | G     | T     | A     | T     |
| O         | G             | A     | C     | C     | C     | C     | G     | T     | A     | T     |
| P         | C             | C     | T     | C     | C     | C     | G     | T     | A     | T     |
| Q         | C             | C     | C     | C     | T     | C     | G     | T     | A     | T     |
| R         | C             | C     | T     | C     | T     | A     | T     | A     | C     | G     |
| S         | C             | T     | C     | C     | T     | A     | T     | A     | C     | G     |
| T         | C             | C     | T     | C     | T     | C     | G     | T     | A     | T     |
| U         | C             | A     | C     | C     | C     | A     | T     | A     | C     | G     |
| V         | G             | A     | T     | C     | C     | C     | G     | T     | A     | T     |

***CYTb***

| Haplotype | Polymorphisms |     |     |     |     |     |     |     |     |     |     |     |     |
|-----------|---------------|-----|-----|-----|-----|-----|-----|-----|-----|-----|-----|-----|-----|
|           | 279           | 299 | 348 | 362 | 369 | 517 | 547 | 566 | 675 | 742 | 832 | 833 | 838 |
| 1         | T             | C   | A   | C   | G   | T   | C   | C   | A   | C   | T   | T   | C   |
| 2         | C             | C   | A   | C   | G   | C   | C   | C   | A   | C   | T   | T   | T   |
| 3         | C             | C   | A   | C   | G   | C   | C   | C   | A   | C   | T   | T   | C   |

|    |   |   |   |   |   |   |   |   |   |   |   |   |   |
|----|---|---|---|---|---|---|---|---|---|---|---|---|---|
| 4  | C | C | A | C | G | C | C | T | A | C | T | T | C |
| 5  | C | C | G | C | G | C | C | C | A | C | T | T | C |
| 6  | C | C | A | C | G | T | C | C | A | C | T | T | C |
| 7  | C | C | G | C | G | T | C | C | A | C | T | T | C |
| 8  | T | C | G | C | G | T | C | C | A | C | T | C | C |
| 9  | C | C | A | C | G | T | C | C | A | C | T | T | T |
| 10 | C | C | G | C | G | C | C | C | A | C | T | T | T |
| 11 | T | C | A | C | G | C | C | C | A | C | T | T | C |
| 12 | C | C | G | C | G | T | C | C | A | C | T | T | T |
| 13 | T | C | A | C | G | C | C | C | A | C | T | T | T |
| 14 | C | C | A | C | G | C | C | T | A | C | T | T | T |

| SOD           |     |     |     |
|---------------|-----|-----|-----|
| Polymorphisms |     |     |     |
| Haplotype     | 110 | 179 | 215 |
| a             | C   | T   | T   |
| b             | T   | T   | C   |
| c             | T   | T   | T   |
| d             | C   | T   | C   |

\*Polymorphism positions are indicated, according to their respective GenBank reference sequence: NC\_020331.1 (*mtLSU*), AF146753.1 (*SOD*), AF320344.1 (*CYTB*).

**Technical Appendix Table 3.** Hunter Index: (D) value for *mtLSU*, *CYTB*, and *SOD* loci independently and in association, with previously described (classical) amplicons and new (extended) amplicons on 19 unrelated strains presenting a very major genotype

| Amplicon type           | <i>mtLSU</i>             | <i>CYTB</i>              | <i>SOD</i>               | <i>mtLSU-CYTB</i>         | <i>mtLSU-CYTB-SOD</i>     |
|-------------------------|--------------------------|--------------------------|--------------------------|---------------------------|---------------------------|
| Classical amplicons (1) | 4 genotypes<br>D = 0.754 | 4 genotypes<br>D = 0.684 | 2 genotypes<br>D = 0.526 | 10 genotypes<br>D = 0.918 | 15 genotypes<br>D = 0.971 |
| Maitte et al. (1)       | D = 0.751                | D = 0.794                | D = 0.57                 | D = 0.957                 | D = 0.987                 |
| New amplicons           | 9 genotypes<br>D = 0.883 | 4 genotypes<br>D = 0.684 | 2 genotypes<br>D = 0.526 | 13 genotypes<br>D = 0.953 | 16 genotypes<br>D = 0.982 |

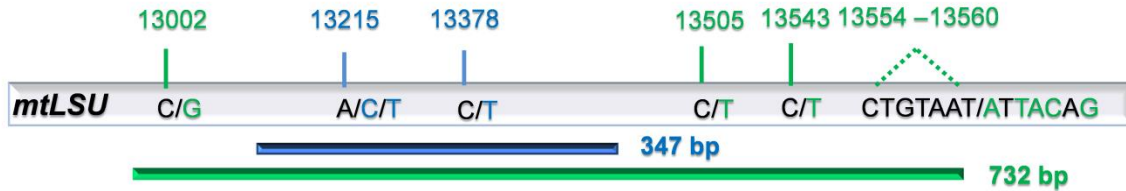

**Technical Appendix Figure.** New polymorphisms described on the *mtLSU* extended locus. Blue line shows 347 bp sequence corresponding to the amplification with previously described primers (1). Green line shows 732 bp sequence corresponding to the amplification using primers described in this study. Bars show single nucleotide or multinucleotide polymorphisms with their corresponding positions on the mitochondrial genome. Blue-colored polymorphisms are previously described, whereas green-colored polymorphisms are newly described in this study.

**Reference**

1. Maitte C, Leterrier M, Le Pape P, Miegville M, Morio F. Multilocus sequence typing of *Pneumocystis jirovecii* from clinical samples: how many and which loci should be used? J Clin Microbiol. 2013;51:2843–9. [PubMed http://dx.doi.org/10.1128/JCM.01073-13](http://dx.doi.org/10.1128/JCM.01073-13)
